# Supplementary material
Source: Elsevier journal article supplement (https://www.sciencedirect.com/science/article/pii/S0212656716300683)
Supplement: mmc1 [file S0212656716300683:mmc1.docx]

| RELATOS DE EXPERIENCIAS DE DIFICULTADES RELACIONADAS CON LOS PROFESIONALES  ANEXO 1. RELATOS DE EXPERIENCIAS DE L@S PARTICIPANTES |
| --- |
| **Falta de conocimiento sobre el proceso de PAD** |
| - *E.1. yo no creo que tenga a lo mejor formación necesaria para manejar ese tema* |
| - *E. 9. lo primero que, pienso por lo menos por mi parte que me falta información, de qué es lo que se, qué es lo que hay, que es lo que se le oferta y explicárselo, nosotros sabemos que existe pero bueno tampoco, lo que tu tengas que informar, nadie te ha informado mucho de esto ¿no?* |
| - *E.10. Pues sí, sobre esto yo la verdad sí me gustaría saber más cosas…Porque la verdad es que yo he leído poco acerca de eso y no he tenido así posibilidad de hacer cursos, nada más que el que te he dicho…* |
| - *E. 11. lo ideal sería preparar esos momentos porque esto ya está acercándose, ¿no? Entonces tú les vas diciendo a ellos cuándo se va acercando, eso sería lo ideal, pero creo que nos hace falta mucha habilidad, mucha formación y…mucha deficiencia tenemos, ¿eh? tenemos mucha necesidad de formación con respecto a eso ¿eh?* |
| - *E.11. lo que sí sería importantísimo sería la formación, pero a todos los niveles, no solamente ya por inquietud propia o porque tú quieras o porque seas responsable ahora de paliativos o porque quieras embarcarte ahora en eso, no. Es que todo el mundo tenemos contacto con ese tipo de gente…* |
| - *E.13. Yo creo que sobre todo es el déficit que tenemos todos. Si es que va todo siempre a lo mismo. En la medida en que domines un tema y que pues te es más fácil atenderlo, o sea, aplicarlo y eso.* |
| **Falta de habilidades de comunicación** |
| - *E.1. Pues sí, para manejar estas situaciones, si , una formación para tener, para adquirir unas habilidades y tener unos recursos a la hora de manejar este tipo de situaciones, pues si, dar información o malas noticias, tratar el tema con la familia, hablarlo con la familia para después hablarlo con el paciente, pues si estas habilidades seria interesantes tenerlas* |
| - *E.6. hombre yo entiendo que es un tema difícil hablar de determinadas cosas, no estamos acostumbrados, nosotros nos hemos formado mucho pues en la técnica y luego cuando tenemos que hablar con la gente pues siempre cuesta más trabajo* |
| - *E.11. Y tener claro realmente cómo ayudar a esa persona ¿no? Y cómo sacar información válida sin ser pesada, sin ser…* |
| **Falta de experiencia** |
| - *E.12. Sí, para mí es un apuro ahora mismo porque no tengo experiencia en este sentido…* |
| - *E.12. Hombre yo creo que eso es cuando lleves más casos…pues se me irá… O sea me parecerá más fácil. O eso espero por lo menos.* |
| **Presencia de emociones negativas** |
| - *E.1. pero abordar el tema de la manera que estamos planteando entre la familia y el paciente pues un poco con ansiedad o con angustia porque no sabes muy bien cómo manejar el tema, eh?* |
| - *E.1.: no quieres sacar el tema para no angustiar más al paciente* |
| - *E.3. porque al principio sentía mucha rabia y mucha impotencia.* |
| - *E.3. Pero aún así, como no eres de piedra pues muchas veces te vas triste* |
| - *E.3. …no, el carácter, hay personas que son muy depresivos, que son muy negativos y que cuando le eches esto es una losa que le echas encima y los abocas a una depresión constante, y se tienen que dar de baja* |
| - *E.4. o nos sigue dando miedo a lo mejor* |
| - *E.4. ese pudor que tenemos de hablar abiertamente de una cosa así,* |
| - *E.5. pero mmmm hay mucho desconocimiento yo creo todavía por parte de los compañeros, desconocimiento y miedo* |
| - *E.5. Es difícil, pero no es tanto como por negación de trabajo como por el hecho de…, de sentirnos un poco inútiles y enfrentarnos a esa situación o ver a alguien que se está muriendo, no lo sé.., a nadie nos gusta* |
| - *E.6. a mí me genera mmmmm, me genera estrés en muchas situaciones, si.* |
| - *E.6. es que implicarse en las emociones, mira, el año pasado estuve haciendo un curso con, de, grupos de autoayuda, es que implicarse en las emociones de la gente es que cuesta mucho trabajo,* |
| - *E.7. también le tenemos miedo a decir que te vas a morir, imagino que es una cosa muy dura* |
| - *E. 13 es incómodo, esa es la palabra, es incomodidad porque sientes pues eso, que lo estás engañando, que no es necesario,* |
| - *E.13 en general no nos atrevemos, esos temas no se han hablado con la familia y de hecho nosotros mismos yo hago mi… pues no, porque parece que te vas a poner triste y no te pones a hablar oye si me pasa… son temas que los dejas pasar.* |

| RELATOS DE EXPERIENCIAS DE DIFICULTADES RELACIONADAS CON LA ORGANIZACIÓN SANITARIA |
| --- |
| **Falta de tiempo** |
| - *E.11. no sé, tengo esa sensación de que no me da tiempo, de que no llego…* |
| - *E.11. Entonces realmente es eso, la falta de tiempo. Y el tiempo que tengas, aunque sea menos, sea mínimo pues saber aprovecharlo, saber gestionar el tiempo* |
| - *E.2. si nosotros precisamente lo que siempre decimos es que nos falta tiempo, o sea que es que, yo no sé los otros centros de salud pero aquí trabajamos muy estresados* |
| - *E.10. Eso del tiempo la verdad también es que no tienes, no cuentas con ese factor de que digas yo me puedo ir allí una hora a echar un rato con…* |
| - *E. 12. Pues depende. Depende de los que tenga y porque yo que sé, si no tienes por ejemplo ninguna cura domiciliaria pues puedes dedicarte más a estas cosas. Y ahora si tienes un par de curas programadas pues… tienes que hacer las curas y esto… tienes menos tiempo.* |
| - *E.4. La verdad es que hay veces que vamos muy apuraillos la verdad y de aquí palante pues peor* |
| - *E.5. Tampoco disponemos de tiempo como para abarcar otro campo más, ¿entiendes?* |
| - *E.5. si, si, yo creo que sería interesante pero………..,pero eso que requiere tiempo como vamos todos con el tiempo como vamos pues tampoco muchas veces ese tema…..* |
| - *E.5. es lo que estamos hablando, nosotros como enfermeros sabes que estamos hablando de llegar, ponerle una inyección, hacer una cura, sabes que tienes el tiempo, unos más rápido otros menos pero sabes lo que es pero cuando te sacas un tema de estos, imagÍnate que nosotros en vez de estar hablando de este tema estuviésemos hablando de queeee…., como paciente y profesional, sabes cuando empiezas pero cortar…..* |
| - *E.5. se te puede ir la mañana, se te puede ir la mañana, aunque a veces intentes medio cortar o dejar, quedar para otro día o lo que sea, pero al menos media hora, si quieres conseguir que alguien de verdad suelte o libere sentimientos media hora mínimo necesitas, eso como poco, poco, poco y si eres un fenómeno porque no me lo considero y media hora…..* |
| - *E.6. con el paciente en si como tu me estas preguntando muy poco porque mmmmm… entre otras cosas también te voy a decir una cosa, necesitas* ***tiempo*** *para eso… y normalmente en primaria vamos como corriendo.* |
| - *E.6. porque si tienes siete avisos y tienes que hacerlos todos y tienes que… pues yo necesito un poco más de intimidad y un poco más de tiempo para hablar de ese tema con…* |
| **Interferencias con otros profesionales** |
| - *E.3. …has trabajado con las cuidadoras anteriormente el proceso de poner o no poner la sonda, de esa limitación, de ese encarnizamiento terapéutico y lo has estado trabajando y llega el médico y dice pues: hay que ponerle la sonda nasogástrica o hay que cogerle una vía y tu todo lo que has estado trabajando anteriormente, ¿eh? pues ya te lo destruye.* |
| - *E.3. …y dices bueno, habíamos trabajado esto y ahora qué pasa, pero es que yo no voy a dejar morir de hambre a mi madre o a mi padre o a fulanico de copas, que estoy cuidando, porque entre otras cosas el médico me ha dicho es que no la vamos a dejar morir de hambre* |
| - *E.3. Otra vez su médico de cabecera, sube el médico de cabecera, otra vez al hospital, ¿Dónde muere el hombre?, donde no quería, en el hospital.* |
| - *E.4. Hoy en día si yo hablo de eso con una abuela pues a lo mejor me cae un chaparrón,* |
| - *E.11. Claro, la dificultad que tenemos en muchos sitios que también llevan muchos años, pues el médico es una institución, están “endiosados” realmente, ha sido “Don fulanico” de toda la vida de Dios. Cuando era APD, y luego cuando hemos llegado nosotros, hemos llegado otros con otras historias que ellos no admiten… ¿Cómo puede una enfermera decirle lo que tiene que hacer?* |

| RELATOS DE EXPERIENCIAS DE DIFICULTADES RELACIONADAS CON LAS PERSONAS ENFERMAS Y SUS FAMILIAS |
| --- |
| **Resistencia de las personas para conversar sobre el final de la vida** |
| - *E.1. Pues ya está, no hacen alusión, es decir, no tenemos pacientes crónicos, donde tenga un proceso de reagudización, y ellos tengan sensación de muerte inminente, que además los tenemos, no vienen a decirte: yo no quiero sufrir, a mí póngame….No.* |
| - *E.10. No…Yo la experiencia así que tengo, la gente así más jóvenes que tiene cáncer o que ve que está así… ¿sabes? Es una gente retraída que no…no suele hablar ¿sabes? No suele hablar mucho con… de cómo se sienten y eso…* |
| - - *E. 11. La mayoría no quieren saber ¿eh?* |
| - - *E.3. muy pocas veces te lo preguntan, la mayoría de las veces no te lo preguntan, porque cuando terminas de estar con él, ese día o a los siguientes días ¿quieres algo más de mi, quieres saber algo más de tu enfermedad? Nunca.* |
| - - *E.5. No, es muy, muy, muy, muy, muy complicado. Vamos a ver, ellos de la muerte hablan en un plan de pueblo, como decimos aquí, ea si yo ya lo que tenía es que morirme, pero eso no indica realmente que quieran ni hayan pensado. Realmente en serio, una conversación en serio, es decir qué piensas o qué te gustaría, no. Aquí, mmmm (titubea) aquí en estos pueblos es complicado.* |
| - - *E. 5. No, no, no. No habla, vamos en general no hablan. Vamos pueden hablar en un momentillo, en un mmmm un momento dado como hace cualquier abuelillo que está sentado en la puerta de su casa yyyyy dice que no vale para nada, yo ya lo que tenía era que morirme, si yo me tengo que morir, pero no lo dicen digamos entre comillas en serio.* |
| - - *E.9…. hablan poco de la muerte, ya te digo que todos dicen yo me quiero morir rapidito pero sin más detalle.* |
| **Pacto de silencio en el entorno familiar** |
| - - *E.1. Y porque es que la familia siempre está ahí y la familia le ha informado de lo que ha querido, de lo que ha considerado y todavía no está, qué diría yo, instaurado que el paciente debe saber cuál es su proceso, la toma de decisiones.* |
| - - *E.3. Con los procesos oncológicos la conspiración del silencio está en cuanto que entras, en todos, muy poquitos, contados con los dedos de la mano se escapan de esa situación, vale?. Entonces ya en cuanto te ven entrar ya te hacen la mueca o han venido antes previamente a hablar conmigo* |
| - - *E.5. por supuesto la familia que tenemos una, unas reticencias y resistencias abrumadoras. Lo primero que te dicen es usted no les diga nada ¿eh?* |
| - - *E.6. eh, entre otras cosas, entre otras cosas te digo porque hay muchos pacientes que sabes lo que pasa, los mismos familiares no quieren decir nada. ….Ya hay veces que ya “na” más cuando te están dando el informe te están haciendo así, te están haciendo señales de que no digas na, de que no digas “na”…* |
| - - *E.7. la famosa conspiración de silencio y por detrás sssssssss, o sea tú lo sabes y estás ahí, yo lo sé y estoy aquí, pero no hablamos del partido, hablamos del tiempo,* |
| - - *E. 9. ….claro, claro, totalmente, ellos gestionan todo, los que no quieren que se sepa ellos gestionan todo y además te llaman y cuando das el aviso lo dicen, que vengáis porque le pasa esto y esto pero que no sabe nada* |
| - - *E. 13. porque te encuentras con lo típico, que se le niega la información al paciente….., eso de siempre, eso sigue siendo así, y respeta mucho, hasta ahora, el sanitario ha respetado mucho eso. Lo que te diga la familia* |
| - - *E.13. pues te estorba eso, esa confidencialidad que has adquirido con la familia de no decirle la verdad, entonces pues, ay es que, es que hoy estoy peor, Qué es lo que me pasa.. y tú estás ahí, claro que está peor y vas a estar peor mañana y pasado pero no se lo puedes decir, cómo te lo digo.* |
| - - *E.6. la cuidadora está siempre presente, siempre presente, es muy difícil que tú estés con el paciente solo en el domicilio, muy difícil. siempre hay alguien. Eso yo es una cosa que yo, yo la echo de menos para poder hablar con el paciente… y el problema es que como no estás solo, y muchas veces me lo he planteado, digo esto tendría yo que, tendría yo que hacer, inventarme algo para, no sé, para mandar al cuidador fuera. Lo he pensado.* |

| **RELATOS DE EXPERIENCIAS RELACIONADAS CON CONDICIONAMIENTOS CULTURALES Y RELIGIOSOS** |
| --- |
| **Muerte como tabú** |
| - *E.7…no entras ahí hasta que ellos te lo nombran, o sea es como, digamos que es un poco tabú igual que la vida sexual* |
| - *E.14. El hablar lo que sería el final de la vida o de la muerte en sí, la gente es un tema tabú. Cuando debería ser pues una etapa más de la vida ¿no?* |
| **Sociedad de lo “inmediato”** |
| - *E.3. Yo muchas veces, lo, lo pienso, estamos en esta sociedad tan inmediata que todo tiene que tener respuesta en el acto y a la muerte también y todo lo que sea dolor sufrimiento, molesta, lo tenemos que apartar* |
| - *E.14. Claro porque además con nuestra forma de ser, es muy raro que la gente planifique a muy largo plazo* |
| **Ocultar la muerte** |
| - *E. 5. porque esta cultura que tenemos es de esconder, de escondernos, de esconder la muerte y de verla como un, como un fracaso.* |
| - *E.9. …pero claro, también es la cultura nuestra muchas veces de negarlo, hombre ya te pondrás bien, o ya te pondrás…. a ver si te hace efecto la medicación, a ver si cambias y entonces siempre…, que si, que nosotros tampoco muchas veces hablas claramente.* |
| - *E.9. Entonces (risas) yo lo he vivido en mi casa y ahora parece como que queremos ocultar a los niños, queremos ocultar a la gente que nos tenemos que morir, que no se habla de eso* |
| **La religión** |
| - *E.13. No yo creo que ahí estamos muy bien reflejados todos, vamos nuestra cultura que es, la gente aunque tenga su fe y sus cosas pero luego lo de la muerte no lo tenemos así tan habitual (risas) como charla* |
| - *E.3. …. que también tenemos que partir de la cultura judeo cristiana de la que partimos que no lo va a admitir todo el mundo (E3)* |
